# Supplementary material for: A critical evaluation of TRPA1-mediated locomotor behavior in zebrafish as a screening tool for novel anti-nociceptive drug discovery
Source: PubMed Central journal article supplement (PMC6382835; doi:10.1038/s41598-019-38852-9), 2019-02-20
Supplement: 41598_2019_38852_MOESM1_ESM.pdf [file 41598_2019_38852_MOESM1_ESM.pdf]

1 **Title page**

2 **Title:** A critical evaluation of TRPA1-mediated locomotor behavior in zebrafish as a  
 3 screening tool for novel anti-nociceptive drug discovery

4  
 5 **Authors:** Mee Jung Ko<sup>1,3,4†</sup>, Logan C. Ganzen<sup>2,3,4†</sup>, Emre Coskun<sup>2</sup>, Arbaaz A. Mukadam<sup>1</sup>,  
 6 Yuk Fai Leung<sup>2,3,4,5,6</sup>, Richard M. van Rijn<sup>1,3,4,5</sup>

7

8

9

**Supplementary information**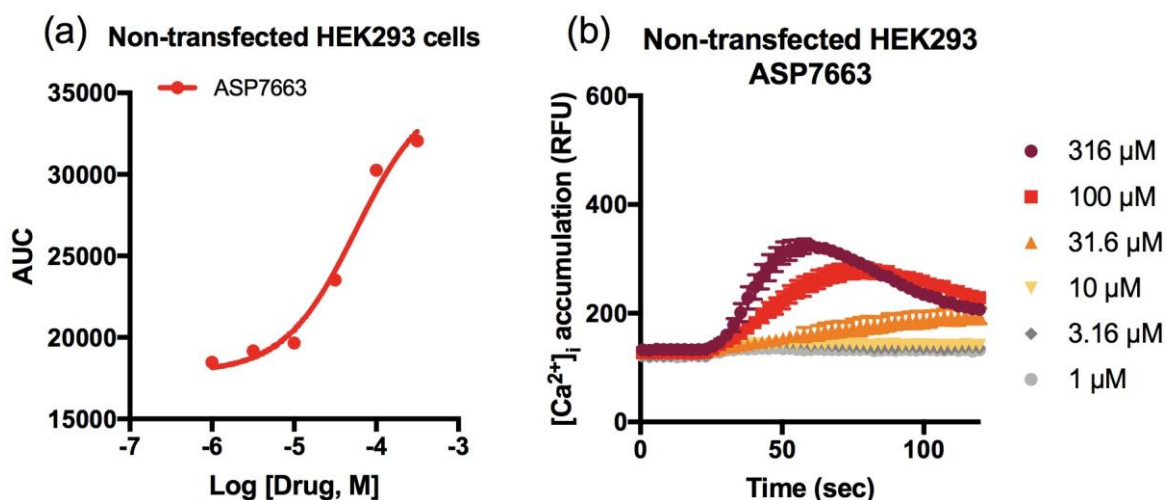

10

11 **Supplemental Figure 1. Potential off-target effect of ASP7663 in non-transfected**

12 **HEK293 cells (a)** Dose-response curve of ASP7663 in non-transfected HEK293 cells

13 (ASP7663:  $pEC_{50} = 4.27 \pm 0.03$ ,  $n=3$ ). Relative Fluorescent Unit (RFU) of ASP7663 dose

14 response calcium influx in non-transfected HEK293 (b). (a) was measured by area under the

15 curve (AUC) of the RFU.

16

17

18

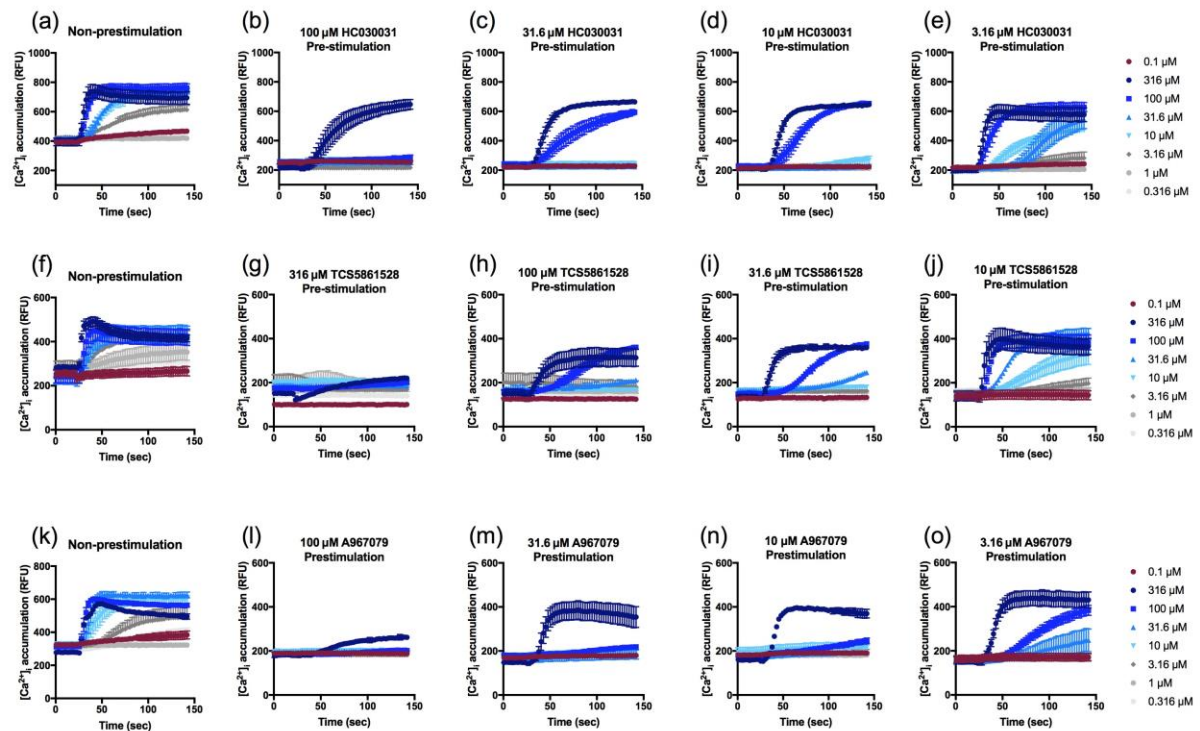

1

2 **Supplemental Figure 2. Calcium influx to TRPA1 antagonists in HEK293 cells**3 **transiently expressing mTRPA1. (a, f, k) Intracellular calcium levels of HEK293 cells**4 **transiently expressing mTRPA1 to ASP7663 with half-log dilutions. (b-e) ASP7663 dose-**5 **response calcium influx to HC-030031 with half-log dilutions. (g-j) ASP7663 dose-response**6 **calcium influx to TCS-5861528 with half-log dilutions. ASP7663 dose-response calcium**7 **influx to A-967079 with half-log dilutions. The AUC of the RFU was further analyzed in**8 **Figure 2.**

9

10

11

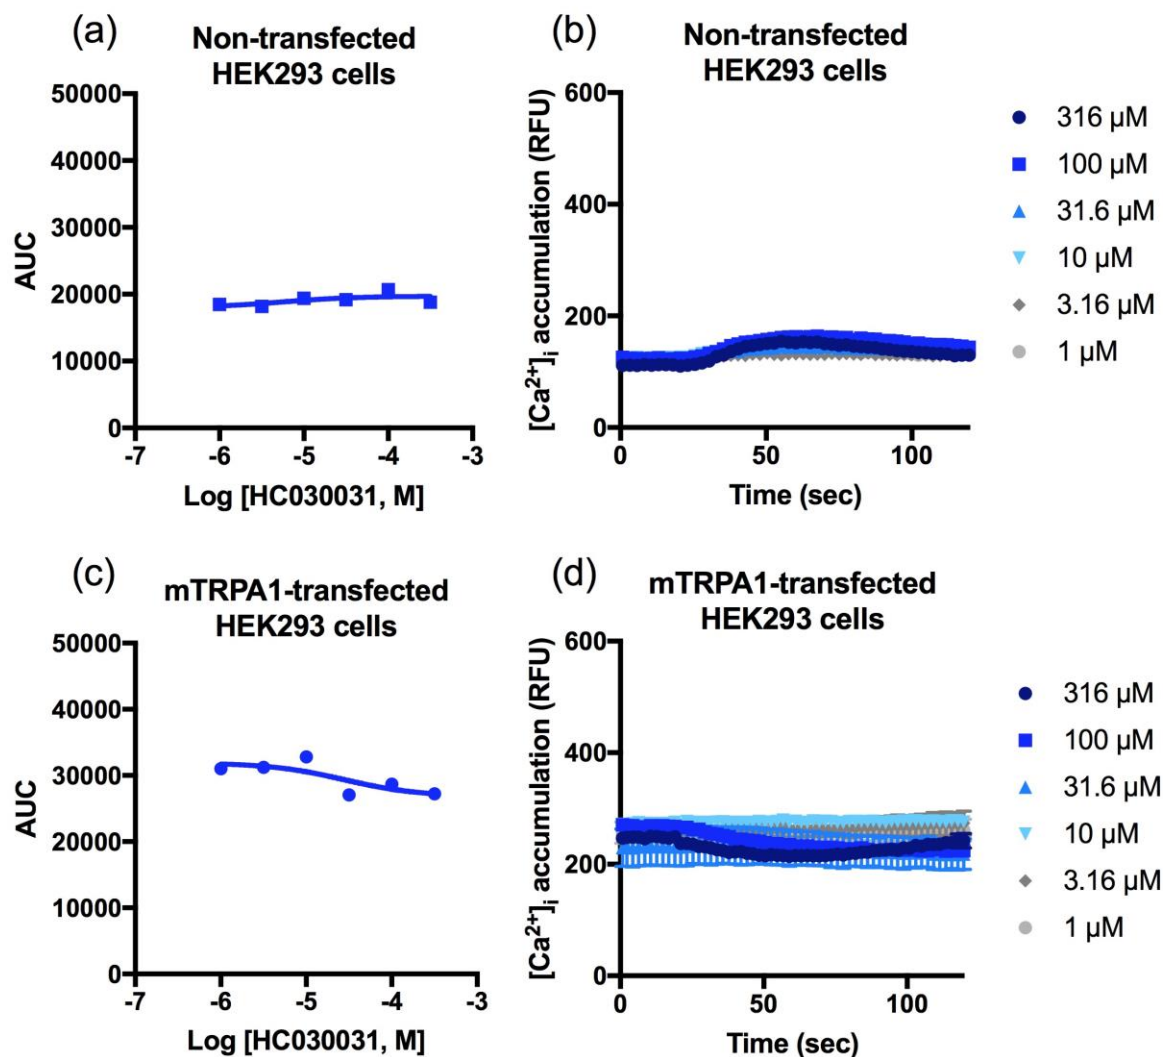

1

2 **Supplemental Figure 3. Calcium influx to HC-030031 in non-transfected or mTRPA1**3 **transfected HEK293 cells. Dose response intracellular calcium levels of HC030031 in non-**4 **transfected HEK293 cells (a) and mTRPA1-transfected HEK293 cells (c). Relative**5 **Fluorescent Unit (RFU) of HC030031 dose response calcium influx in non-transfected**6 **HEK293 (b, d). (a, c) were measured by area under the curve (AUC) of the RFU. (mTRPA1:**7 **pIC<sub>50</sub> = 5.77 ± 0.21, n=4).**

8

9

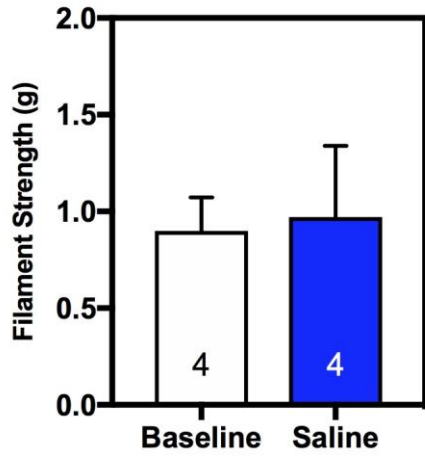

1

2 **Supplemental Figure 4. Mechanical hypersensitivity was not changed by saline injection**

3 **in C57BL/6 mice.** Mechanical sensitivity was measured in C57BL/6 mice pre- and post-

4 saline administration (n=4 per treatment) in response to von Frey filament stimulation.

5 (Unpaired t-test,  $p=0.8692$ ).

6

7

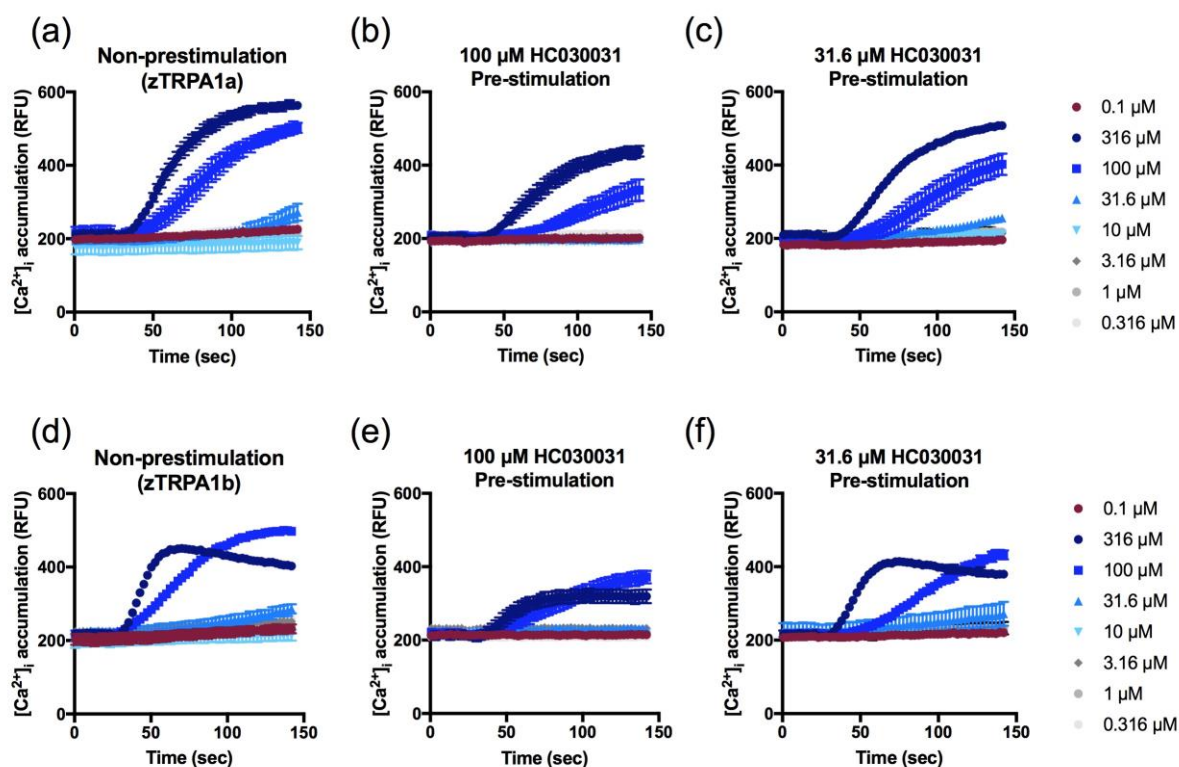

1

2 **Supplemental Figure 5. Calcium influx to HC-030031 in HEK293 cells transiently**3 **expressing zTRPA1a and zTRPA1b. (a, b)** Intracellular calcium levels of HEK293 cells

4 transiently expressing zTRPA1a and zTRPA1b respectively to ASP7663 with half-log

5 dilutions. **(b,c)** ASP7663 dose-response calcium influx in zTRPA1a to HC-030031 with a6 full-log dilution. **(e,f)** ASP7663 dose-response calcium influx in zTRPA1b to HC-030031

7 with a full-log dilution. The AUC of the RFU was further analyzed in Figure 4.

8

9

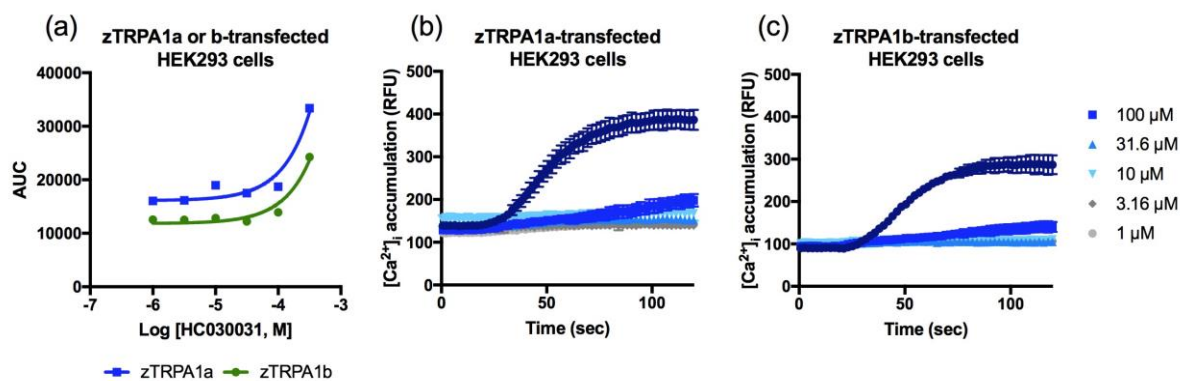

1

2 **Supplemental Figure 6. HC030031 works as weak agonist at high concentration. (a)**

3 Dose-response curve of HC030031 in zTRPA1a-transfected, and zTRPA1b-transfected

4 (Green) HEK293 cells (zTRPA1a:  $pEC_{50} = 2.85 \pm 0.19$ ,  $n=4$ ; zTRPA1b: Non-determinant,5  $n=3$ ). Relative Fluorescent Unit (RFU) of HC030031 dose response calcium influx in

6 zTRPA1a-transfected (b), and zTRPA1b-transfected (c) HEK293 cells. (a) was measured by

7 area under the curve (AUC) of the RFU.

8

9

10

11

12
